# Supplementary material for: Unilateral Cleavage Furrows in Multinucleate Cells
Source: Cells. 2020 Jun 18;9(6):1493. doi: 10.3390/cells9061493 (PMC7349700; doi:10.3390/cells9061493)
Supplement: Supplementary file 1 [file cells-09-01493-s001.zip]

Archive with 7 entries (7 files):
- cells-739708_Bindletal_Video Legends_rev.pdf
- Video 1.mp4
- Video 2.mp4
- Video 3.mp4
- Video 4.mp4
- Video 5.mp4
- Video 6.mp4
